# Supplementary material for: Distribution of Cytotoxic T Lymphocyte-Associated Antigen-4 Promoter Polymorphisms in Taiwanese Patients with Type 2 Diabetes Mellitus
Source: PubMed Central journal article supplement — Int J Med Sci. 2018 Feb 12;15(4):395–402. doi: 10.7150/ijms.23097 (PMC5835710; doi:10.7150/ijms.23097), 2018-02-12
Supplement: ijmsv15p0395s1.pdf [file ijmsv15p0395s1.pdf]

**SUPPLEMENTARY MATERIALS**

**Table S1. Frequencies of genotypic polymorphisms in T2DM patients and control subjects.**

|                       | <b>Control</b> | <b>T2DM</b>  | <b>P<sup>†</sup> value</b> |
|-----------------------|----------------|--------------|----------------------------|
|                       | <b>n (%)</b>   | <b>n (%)</b> |                            |
| <i>CTLA-4</i> -318C/T | n=520          | n=476        |                            |
| C/C                   | 378 (72.69)    | 342 (71.85)  | 0.72                       |
| C/T                   | 129 (24.81)    | 118 (24.79)  |                            |
| T/T                   | 13 (2.50)      | 16 (3.36)    |                            |
| C allele              | 885 (85.10)    | 802 (84.24)  | 0.87                       |
| T allele              | 155 (14.9)     | 150 (15.76)  |                            |
| <br>                  |                |              |                            |
| <i>CTLA-4</i> +49A/G  | n=520          | n=476        |                            |
| A/A                   | 71 (13.65)     | 45 (9.45)    | 0.014                      |
| A/G                   | 252 (48.46)    | 212 (44.54)  |                            |
| G/G                   | 197 (37.88)    | 219 (46.01)  |                            |
| A allele              | 394 (37.88)    | 302 (31.72)  | 0.016                      |
| G allele              | 646 (62.12)    | 650 (68.28)  |                            |

\*Number in the parentheses indicated the percentage.

†Chi-square test
